# Supplementary material for: Understanding Online Hotel Reviews Through Automated Text Analysis
Source: Atypon-hosted journal article supplement (doi:10.1287/serv.2016.0126), 2016-05-05
Supplement: serv.2016.0126-sm.pdf [file serv.2016.0126-sm.pdf]

**Understanding Online Hotel Reviews through Automated Text Analysis**  
**Electronic Supplement**

**Table 1: Multicollinearity Assessment. Generalized variance inflation factors after adjusting for degrees of freedom<sup>a</sup>, for each of the regression models.**

|                             | Model 1 | Model 2 | Model 3 | Model 4 | Model 5 | Model 6 | Model 7 | Model 8 |
|-----------------------------|---------|---------|---------|---------|---------|---------|---------|---------|
| Property Dummy              | 1.00    | 1.00    | 1.00    | 1.00    | 1.00    | 1.00    | 1.01    | 1.01    |
| log(Word Count)             | 1.70    | 1.93    | 1.88    | 1.94    | 1.94    | 1.95    | 2.12    | 2.17    |
| Sentiment-                  | 1.37    | 2.36    | 1.52    | 1.53    | 1.53    | 1.54    | 1.57    | 4.61    |
| Sentiment+                  | 1.47    | 2.30    | 2.30    | 2.30    | 2.30    | 2.31    | 2.44    | 4.66    |
| Sentiment-^2                |         | 2.07    |         |         |         |         |         |         |
| Sentiment+^2                |         | 1.86    |         |         |         |         |         |         |
| Sentiment-^2 + Sentiment+^2 |         |         | 1.88    | 1.88    | 1.88    | 1.88    | 1.91    | 2.09    |
| Focus                       |         |         |         | 1.14    | 1.14    | 1.14    | 1.29    | 1.37    |
| Flesch-Kincaid Grade Level  |         |         |         |         | 1.00    | 1.00    | 1.00    | 1.00    |
| Traveler Type:              |         |         |         |         |         | 1.03    | 1.03    | 1.03    |
| <b>Topics:</b>              |         |         |         |         |         |         |         |         |
| Topic 1 (Experience)        |         |         |         |         |         |         | 1.16    | 2.03    |
| Topic 2 (Location)          |         |         |         |         |         |         | 1.25    | 2.15    |
| Topic 3 (Transactions)      |         |         |         |         |         |         | 1.23    | 2.19    |
| Topic 4 (Amenities)         |         |         |         |         |         |         | 1.18    | 1.98    |
| Topic 5 (Value)             |         |         |         |         |         |         | 1.36    | 2.28    |
| <b>Sentiment- x Topic:</b>  |         |         |         |         |         |         |         |         |
| Sentiment- x Topic 1        |         |         |         |         |         |         |         | 2.18    |
| Sentiment- x Topic 2        |         |         |         |         |         |         |         | 1.74    |
| Sentiment- x Topic 3        |         |         |         |         |         |         |         | 3.17    |
| Sentiment- x Topic 4        |         |         |         |         |         |         |         | 2.19    |
| Sentiment- x Topic 5        |         |         |         |         |         |         |         | 1.61    |
| <b>Sentiment+ x Topic:</b>  |         |         |         |         |         |         |         |         |
| Sentiment+ x Topic 1        |         |         |         |         |         |         |         | 2.88    |
| Sentiment+ x Topic 2        |         |         |         |         |         |         |         | 2.52    |
| Sentiment+ x Topic 3        |         |         |         |         |         |         |         | 3.00    |
| Sentiment+ x Topic 4        |         |         |         |         |         |         |         | 2.55    |
| Sentiment+ x Topic 5        |         |         |         |         |         |         |         | 2.52    |

<sup>a</sup> Generalized variance inflation factors (GVIF) were calculated using the Fox-Monette (1992) method. Reported results in the table are after adjustment for degrees of freedom (df) using the formula  $GVIF^{1/(2 * df)}$  as suggested by Fox and Monette (1992).

**Table 2: Robustness Check: Summary of common readability measures**

|              | Flesch-Kincaid Readability | SMOG Readability | FOG Readability | ARI Readability |
|--------------|----------------------------|------------------|-----------------|-----------------|
| Min          | 1.575                      | 3.129            | 1.943           | -3.456          |
| 25% Quartile | 7.318                      | 9.236            | 9.021           | 7.175           |
| Median       | 8.728                      | 10.290           | 10.793          | 8.832           |
| Mean         | 9.053                      | 10.503           | 11.142          | 9.241           |
| 75% Quartile | 10.297                     | 11.472           | 12.733          | 10.651          |
| Max          | 41.256                     | 26.683           | 43.873          | 50.829          |

**Table 3: Robustness Check: Using the SMOG Readability Index**

|                                                           | Model 1              | Model 2              | Model 3              | Model 4              | Model 5              | Model 6              | Model 7              | Model 8              |
|-----------------------------------------------------------|----------------------|----------------------|----------------------|----------------------|----------------------|----------------------|----------------------|----------------------|
| Intercept                                                 | 3.240<br>(0.044)***  | 3.147<br>(0.041)***  | 3.041<br>(0.049)***  | 3.049<br>(0.047)***  | 3.049<br>(0.047)***  | 2.982<br>(0.051)***  | 3.138<br>(0.061)***  | 3.111<br>(0.075)***  |
| Log(word count)                                           | -0.203<br>(0.026)*** | -0.223<br>(0.021)*** | -0.270<br>(0.024)*** | -0.231<br>(0.022)*** | -0.232<br>(0.022)*** | -0.239<br>(0.022)*** | -0.116<br>(0.020)*** | -0.086<br>(0.020)*** |
| (Sentiment)-                                              | -0.113<br>(0.006)*** | -0.150<br>(0.006)*** | -0.098<br>(0.006)*** | -0.093<br>(0.006)*** | -0.093<br>(0.006)*** | -0.091<br>(0.006)*** | -0.076<br>(0.006)*** | -0.091<br>(0.012)*** |
| (Sentiment)+                                              | 0.067<br>(0.004)***  | 0.091<br>(0.005)***  | 0.088<br>(0.005)***  | 0.086<br>(0.004)***  | 0.086<br>(0.004)***  | 0.085<br>(0.004)***  | 0.069<br>(0.004)***  | 0.080<br>(0.007)***  |
| [(Sentiment)-] <sup>2</sup>                               |                      | 0.003<br>(0.000)***  |                      |                      |                      |                      |                      |                      |
| [(Sentiment)+] <sup>2</sup>                               |                      | -0.001<br>(0.000)*** |                      |                      |                      |                      |                      |                      |
| [(Sentiment)-] <sup>2</sup> + [(Sentiment)+] <sup>2</sup> |                      |                      | -0.000<br>(0.000)*** | -0.000<br>(0.000)*** | -0.000<br>(0.000)*** | -0.000<br>(0.000)*** | -0.000<br>(0.000)*** | -0.000<br>(0.000)*** |
| Focus                                                     |                      |                      |                      | -0.092<br>(0.013)*** | -0.092<br>(0.013)*** | -0.093<br>(0.013)*** | -0.104<br>(0.013)*** | -0.090<br>(0.015)*** |
| SMOG Readability Index                                    |                      |                      |                      |                      | 0.015<br>(0.011)     | 0.014<br>(0.011)     | 0.013<br>(0.011)     | 0.014<br>(0.011)     |
| Traveler Type:                                            |                      |                      |                      |                      |                      |                      |                      |                      |
| couples                                                   |                      |                      |                      |                      |                      | 0.153<br>(0.029)***  | 0.117<br>(0.026)***  | 0.114<br>(0.025)***  |
| family                                                    |                      |                      |                      |                      |                      | 0.190<br>(0.046)***  | 0.138<br>(0.043)**   | 0.135<br>(0.041)***  |
| friends                                                   |                      |                      |                      |                      |                      | 0.096<br>(0.038)*    | 0.063<br>(0.036)     | 0.068<br>(0.036)     |
| solo                                                      |                      |                      |                      |                      |                      | 0.118<br>(0.043)**   | 0.106<br>(0.039)**   | 0.091<br>(0.038)*    |
| unspecified                                               |                      |                      |                      |                      |                      | 0.059<br>(0.034)     | 0.053<br>(0.036)     | 0.049<br>(0.036)     |
| Topics:                                                   |                      |                      |                      |                      |                      |                      |                      |                      |
| Topic 1 (amenities)                                       |                      |                      |                      |                      |                      |                      | -0.068<br>(0.021)**  | -0.006<br>(0.044)    |
| Topic 2 (location)                                        |                      |                      |                      |                      |                      |                      | 0.121<br>(0.021)***  | 0.182<br>(0.035)***  |
| Topic 3 (transactions)                                    |                      |                      |                      |                      |                      |                      | -0.122<br>(0.026)*** | -0.254<br>(0.037)*** |

|                               |       |       |       |       |       |       |                      |                      |
|-------------------------------|-------|-------|-------|-------|-------|-------|----------------------|----------------------|
| Topic 4 (value)               |       |       |       |       |       |       | -0.177<br>(0.025)*** | -0.268<br>(0.040)*** |
| Topic 5 (experience)          |       |       |       |       |       |       | 0.306<br>(0.024)***  | 0.571<br>(0.046)***  |
| <b>(Sentiment)- x Topics:</b> |       |       |       |       |       |       |                      |                      |
| (Sentiment)- x Topic 1        |       |       |       |       |       |       |                      | 0.027<br>(0.006)***  |
| (Sentiment)- x Topic 2        |       |       |       |       |       |       |                      | 0.030<br>(0.011)**   |
| (Sentiment)- x Topic 3        |       |       |       |       |       |       |                      | -0.013<br>(0.007)*   |
| (Sentiment)- x Topic 4        |       |       |       |       |       |       |                      | -0.009<br>(0.009)    |
| (Sentiment)- x Topic 5        |       |       |       |       |       |       |                      | -0.008<br>(0.009)    |
| <b>(Sentiment)+ x Topics:</b> |       |       |       |       |       |       |                      |                      |
| (Sentiment)+ x Topic 1        |       |       |       |       |       |       |                      | -0.013<br>(0.004)**  |
| (Sentiment)+ x Topic 2        |       |       |       |       |       |       |                      | -0.016<br>(0.004)*** |
| (Sentiment)+ x Topic 3        |       |       |       |       |       |       |                      | 0.016<br>(0.004)***  |
| (Sentiment)+ x Topic 4        |       |       |       |       |       |       |                      | 0.010<br>(0.003)**   |
| (Sentiment)+ x Topic 5        |       |       |       |       |       |       |                      | -0.024<br>(0.004)*** |
| <b>R<sup>2</sup></b>          | 0.435 | 0.454 | 0.442 | 0.45  | 0.45  | 0.455 | 0.489                | 0.509                |
| <b>Adjusted R<sup>2</sup></b> | 0.429 | 0.448 | 0.437 | 0.444 | 0.444 | 0.448 | 0.483                | 0.502                |

Note: \*\*\* : p-value < 0.001, \*\*: p-value < 0.01, \*: p-value < 0.05.

**Table 4: Robustness Check: Using the FOG Readability Index**

|                                                                                     | Model 1              | Model 2              | Model 3              | Model 4              | Model 5              | Model 6              | Model 7              | Model 8              |
|-------------------------------------------------------------------------------------|----------------------|----------------------|----------------------|----------------------|----------------------|----------------------|----------------------|----------------------|
| Intercept                                                                           | 3.240<br>(0.044)***  | 3.147<br>(0.041)***  | 3.041<br>(0.049)***  | 3.049<br>(0.047)***  | 3.049<br>(0.047)***  | 2.982<br>(0.051)***  | 3.138<br>(0.062)***  | 3.110<br>(0.075)***  |
| Log(word count)                                                                     | -0.203<br>(0.026)*** | -0.223<br>(0.021)*** | -0.270<br>(0.024)*** | -0.231<br>(0.022)*** | -0.232<br>(0.022)*** | -0.239<br>(0.022)*** | -0.116<br>(0.020)*** | -0.086<br>(0.020)*** |
| (Sentiment) <sup>-</sup>                                                            | -0.113<br>(0.006)*** | -0.150<br>(0.006)*** | -0.098<br>(0.006)*** | -0.093<br>(0.006)*** | -0.093<br>(0.006)*** | -0.091<br>(0.006)*** | -0.076<br>(0.006)*** | -0.091<br>(0.012)*** |
| (Sentiment) <sup>+</sup>                                                            | 0.067<br>(0.004)***  | 0.091<br>(0.005)***  | 0.088<br>(0.005)***  | 0.086<br>(0.004)***  | 0.086<br>(0.004)***  | 0.085<br>(0.004)***  | 0.069<br>(0.004)***  | 0.080<br>(0.007)***  |
| [(Sentiment) <sup>-</sup> ] <sup>2</sup>                                            |                      | 0.003<br>(0.000)***  |                      |                      |                      |                      |                      |                      |
| [(Sentiment) <sup>+</sup> ] <sup>2</sup>                                            |                      | -0.001<br>(0.000)*** |                      |                      |                      |                      |                      |                      |
| [(Sentiment) <sup>-</sup> ] <sup>2</sup> + [(Sentiment) <sup>+</sup> ] <sup>2</sup> |                      |                      | -0.000<br>(0.000)*** | -0.000<br>(0.000)*** | -0.000<br>(0.000)*** | -0.000<br>(0.000)*** | -0.000<br>(0.000)*** | -0.000<br>(0.000)*** |
| Focus                                                                               |                      |                      |                      | -0.092<br>(0.013)*** | -0.092<br>(0.013)*** | -0.093<br>(0.013)*** | -0.104<br>(0.013)*** | -0.090<br>(0.015)*** |
| Gunning Fog Index                                                                   |                      |                      |                      |                      | 0.013<br>(0.011)     | 0.012<br>(0.011)     | 0.011<br>(0.011)     | 0.012<br>(0.011)     |
| Traveler Type:                                                                      |                      |                      |                      |                      |                      |                      |                      |                      |
| couples                                                                             |                      |                      |                      |                      |                      | 0.153<br>(0.029)***  | 0.117<br>(0.026)***  | 0.114<br>(0.026)***  |
| family                                                                              |                      |                      |                      |                      |                      | 0.190<br>(0.046)***  | 0.138<br>(0.043)**   | 0.135<br>(0.041)***  |
| friends                                                                             |                      |                      |                      |                      |                      | 0.096<br>(0.038)*    | 0.063<br>(0.036)     | 0.068<br>(0.036)     |
| solo                                                                                |                      |                      |                      |                      |                      | 0.118<br>(0.043)**   | 0.106<br>(0.039)**   | 0.092<br>(0.038)*    |
| unspecified                                                                         |                      |                      |                      |                      |                      | 0.059<br>(0.034)     | 0.053<br>(0.036)     | 0.049<br>(0.036)     |
| Topics:                                                                             |                      |                      |                      |                      |                      |                      |                      |                      |
| Topic 1 (amenities)                                                                 |                      |                      |                      |                      |                      |                      | -0.068<br>(0.021)**  | -0.006<br>(0.044)    |
| Topic 2 (location)                                                                  |                      |                      |                      |                      |                      |                      | 0.121<br>(0.021)***  | 0.182<br>(0.035)***  |

|                               |       |       |       |       |       |       |                      |                      |
|-------------------------------|-------|-------|-------|-------|-------|-------|----------------------|----------------------|
| Topic 3 (transactions)        |       |       |       |       |       |       | -0.122<br>(0.026)*** | -0.253<br>(0.037)*** |
| Topic 4 (value)               |       |       |       |       |       |       | -0.177<br>(0.025)*** | -0.268<br>(0.040)*** |
| Topic 5 (experience)          |       |       |       |       |       |       | 0.306<br>(0.024)***  | 0.571<br>(0.046)***  |
| <b>(Sentiment)- x Topics:</b> |       |       |       |       |       |       |                      |                      |
| (Sentiment)- x Topic 1        |       |       |       |       |       |       |                      | 0.027<br>(0.006)***  |
| (Sentiment)- x Topic 2        |       |       |       |       |       |       |                      | 0.030<br>(0.011)**   |
| (Sentiment)- x Topic 3        |       |       |       |       |       |       |                      | -0.013<br>(0.007)*   |
| (Sentiment)- x Topic 4        |       |       |       |       |       |       |                      | -0.009<br>(0.009)    |
| (Sentiment)- x Topic 5        |       |       |       |       |       |       |                      | -0.008<br>(0.009)    |
| <b>(Sentiment)+ x Topics:</b> |       |       |       |       |       |       |                      |                      |
| (Sentiment)+ x Topic 1        |       |       |       |       |       |       |                      | -0.013<br>(0.004)**  |
| (Sentiment)+ x Topic 2        |       |       |       |       |       |       |                      | -0.016<br>(0.004)*** |
| (Sentiment)+ x Topic 3        |       |       |       |       |       |       |                      | 0.016<br>(0.004)***  |
| (Sentiment)+ x Topic 4        |       |       |       |       |       |       |                      | 0.010<br>(0.003)**   |
| (Sentiment)+ x Topic 5        |       |       |       |       |       |       |                      | -0.024<br>(0.004)*** |
| <b>R<sup>2</sup></b>          | 0.435 | 0.454 | 0.442 | 0.45  | 0.45  | 0.454 | 0.489                | 0.509                |
| <b>Adjusted R<sup>2</sup></b> | 0.429 | 0.448 | 0.437 | 0.444 | 0.444 | 0.448 | 0.483                | 0.502                |

Note: \*\*\* : p-value < 0.001, \*\*: p-value < 0.01, \*: p-value < 0.05.

**Table 5: Robustness Check: Using the Automated Readability Index**

|                                                           | Model 1              | Model 2              | Model 3              | Model 4              | Model 5              | Model 6              | Model 7              | Model 8              |
|-----------------------------------------------------------|----------------------|----------------------|----------------------|----------------------|----------------------|----------------------|----------------------|----------------------|
| Intercept                                                 | 3.240<br>(0.044)***  | 3.147<br>(0.041)***  | 3.041<br>(0.049)***  | 3.049<br>(0.047)***  | 3.048<br>(0.047)***  | 2.981<br>(0.051)***  | 3.136<br>(0.062)***  | 3.109<br>(0.076)***  |
| Log(word count)                                           | -0.203<br>(0.026)*** | -0.223<br>(0.021)*** | -0.270<br>(0.024)*** | -0.231<br>(0.022)*** | -0.232<br>(0.022)*** | -0.239<br>(0.022)*** | -0.116<br>(0.020)*** | -0.086<br>(0.020)*** |
| (Sentiment)-                                              | -0.113<br>(0.006)*** | -0.150<br>(0.006)*** | -0.098<br>(0.006)*** | -0.093<br>(0.006)*** | -0.093<br>(0.006)*** | -0.091<br>(0.006)*** | -0.076<br>(0.006)*** | -0.091<br>(0.012)*** |
| (Sentiment)+                                              | 0.067<br>(0.004)***  | 0.091<br>(0.005)***  | 0.088<br>(0.005)***  | 0.086<br>(0.004)***  | 0.086<br>(0.004)***  | 0.085<br>(0.004)***  | 0.069<br>(0.004)***  | 0.080<br>(0.007)***  |
| [(Sentiment)-] <sup>2</sup>                               |                      | 0.003<br>(0.000)***  |                      |                      |                      |                      |                      |                      |
| [(Sentiment)+] <sup>2</sup>                               |                      | -0.001<br>(0.000)*** |                      |                      |                      |                      |                      |                      |
| [(Sentiment)-] <sup>2</sup> + [(Sentiment)+] <sup>2</sup> |                      |                      | -0.000<br>(0.000)*** | -0.000<br>(0.000)*** | -0.000<br>(0.000)*** | -0.000<br>(0.000)*** | -0.000<br>(0.000)*** | -0.000<br>(0.000)*** |
| Focus                                                     |                      |                      |                      | -0.092<br>(0.013)*** | -0.092<br>(0.013)*** | -0.093<br>(0.013)*** | -0.104<br>(0.013)*** | -0.090<br>(0.015)*** |
| Automated Readability Index                               |                      |                      |                      |                      | 0.009<br>(0.011)     | 0.009<br>(0.011)     | 0.010<br>(0.011)     | 0.011<br>(0.011)     |
| Traveler Type:                                            |                      |                      |                      |                      |                      |                      |                      |                      |
| couples                                                   |                      |                      |                      |                      |                      | 0.154<br>(0.029)***  | 0.117<br>(0.026)***  | 0.114<br>(0.025)***  |
| family                                                    |                      |                      |                      |                      |                      | 0.191<br>(0.046)***  | 0.139<br>(0.043)**   | 0.136<br>(0.041)***  |
| friends                                                   |                      |                      |                      |                      |                      | 0.096<br>(0.038)*    | 0.063<br>(0.036)     | 0.068<br>(0.036)     |
| solo                                                      |                      |                      |                      |                      |                      | 0.117<br>(0.043)**   | 0.106<br>(0.039)**   | 0.091<br>(0.038)*    |
| unspecified                                               |                      |                      |                      |                      |                      | 0.060<br>(0.034)     | 0.054<br>(0.036)     | 0.049<br>(0.036)     |
| Topics:                                                   |                      |                      |                      |                      |                      |                      |                      |                      |
| Topic 1 (amenities)                                       |                      |                      |                      |                      |                      |                      | -0.067<br>(0.021)**  | -0.006<br>(0.044)    |
| Topic 2 (location)                                        |                      |                      |                      |                      |                      |                      | 0.121<br>(0.021)***  | 0.183<br>(0.035)***  |
| Topic 3 (transactions)                                    |                      |                      |                      |                      |                      |                      | -0.122<br>(0.026)*** | -0.253<br>(0.037)*** |

|                               |       |       |       |       |       |       |                                  |                                  |
|-------------------------------|-------|-------|-------|-------|-------|-------|----------------------------------|----------------------------------|
| Topic 4 (value)               |       |       |       |       |       |       | -0.176<br>(0.025) <sup>***</sup> | -0.268<br>(0.040) <sup>***</sup> |
| Topic 5 (experience)          |       |       |       |       |       |       | 0.307<br>(0.025) <sup>***</sup>  | 0.572<br>(0.046) <sup>***</sup>  |
| <b>(Sentiment)- x Topics:</b> |       |       |       |       |       |       |                                  |                                  |
| (Sentiment)- x Topic 1        |       |       |       |       |       |       |                                  | 0.027<br>(0.006) <sup>***</sup>  |
| (Sentiment)- x Topic 2        |       |       |       |       |       |       |                                  | 0.030<br>(0.011) <sup>**</sup>   |
| (Sentiment)- x Topic 3        |       |       |       |       |       |       |                                  | -0.013<br>(0.007) <sup>*</sup>   |
| (Sentiment)- x Topic 4        |       |       |       |       |       |       |                                  | -0.009<br>(0.009)                |
| (Sentiment)- x Topic 5        |       |       |       |       |       |       |                                  | -0.008<br>(0.009)                |
| <b>(Sentiment)+ x Topics:</b> |       |       |       |       |       |       |                                  |                                  |
| (Sentiment)+ x Topic 1        |       |       |       |       |       |       |                                  | -0.013<br>(0.004) <sup>**</sup>  |
| (Sentiment)+ x Topic 2        |       |       |       |       |       |       |                                  | -0.016<br>(0.004) <sup>***</sup> |
| (Sentiment)+ x Topic 3        |       |       |       |       |       |       |                                  | 0.016<br>(0.004) <sup>***</sup>  |
| (Sentiment)+ x Topic 4        |       |       |       |       |       |       |                                  | 0.010<br>(0.003) <sup>**</sup>   |
| (Sentiment)+ x Topic 5        |       |       |       |       |       |       |                                  | -0.024<br>(0.004) <sup>***</sup> |
| <b>R<sup>2</sup></b>          | 0.435 | 0.454 | 0.442 | 0.45  | 0.45  | 0.454 | 0.489                            | 0.509                            |
| <b>Adjusted R<sup>2</sup></b> | 0.429 | 0.448 | 0.437 | 0.444 | 0.444 | 0.448 | 0.483                            | 0.502                            |

Note: \*\*\* : p-value < 0.001, \*\*: p-value < 0.01, \*: p-value < 0.05.

## References:

Fox J., & Monette, G. 1992. Generalized Collinearity Diagnostics. *Journal of the American Statistical Association*, 87(417), 178-183.
